# Supplementary material for: Photoinduced metastable-charging of d-orbital electrons of Re centers enhances interfacial charge migration behavior for efficient coupling conversion
Source: Royal Society of Chemistry journal article supplement (doi:10.1039/d5ta08381h), 2025-11-21
Supplement: d5ta08381h1.pdf [file d5ta08381h1.pdf]

*Supporting Information*

**Photoinduced metastable-charging *d*-orbital electrons of Re centers  
enhances interfacial charge migration behaviors for efficient  
coupling conversion**

Xiang Li<sup>a</sup>, Guiyang Yu<sup>a,\*</sup>, Ruihong Sun<sup>a</sup>, Ke Gong<sup>b</sup>, Jinghao Zhu<sup>a</sup>, Debao Wang<sup>a</sup>

<sup>a</sup> Key Laboratory of Optic-electric Sensing and Analytical Chemistry for Life Science (MOE), College of Chemistry and Molecular Engineering, Qingdao University of Science and Technology, Qingdao, 266042, PR China.

<sup>b</sup> School of Materials Science and Engineering, Ocean University of China, Qingdao 266100, China

**Corresponding Email:** yugy3413@qust.edu.cn

# Contents

## 1. Experimental Section

- 1.1 Preparation of  $\text{ZnIn}_2\text{S}_4$  (ZIS)
- 1.2 Material Characterization
- 1.3 Photoelectrochemical measurements
- 1.4 Density-functional-theory (DFT) calculations
- 1.5 Calculation of Fermi level from UPS spectra
- 1.6 Calculation formula for  $k_{\text{IR}}$  and  $\eta_{\text{int}}$

## 2. Characterization data

**Fig. S1.** XRD patterns of ZIS and various  $\text{ReS}_2/\text{ZIS}$  samples.

**Fig. S2.**  $\text{N}_2$  absorption-desorption isotherms of ZIS and  $\text{ReS}_2/\text{ZIS}$  samples.

**Fig. S3.** (a and b) TEM images and (c) HRTEM image of pure  $\text{ReS}_2$ .

**Fig. S4.** (a-c) SEM images, (d and e) TEM images, (f) SAED image, (g) element mapping image for Zn, In, and S elements, (h) EDX image of  $\text{ZnIn}_2\text{S}_4$  sample.

**Fig. S5.** EDX mapping images for Zn, In, Re, and S elements of 10%  $\text{ReS}_2/\text{ZIS}$  sample.

**Fig. S6.** EPR spectra of pristine ZIS.

**Fig. S7.** (a) XPS survey spectra and (b) Zn 2p XPS spectra of ZIS and 10%  $\text{ReS}_2/\text{ZIS}$  samples.

**Fig. S8.** Structural model for  $\text{ReS}_2/\text{ZIS}$  and the Bader charge transfer number of neighboring atoms.

**Fig. S9.** Standard curves of (a) benzylamine, (b) N-benzylidenebenzylamine and (c)

benzaldehyde by HPLC analysis.

**Fig. S10.** HPLC analysis of (a) standard products and (b) intermediate products in the preliminary reduction process of oxidative coupling reaction of benzylamine.

**Fig. S11.** (a) Photocatalytic oxidative coupling of benzylamine and (b) bar chart of conversion rate for 6 h over ZIS, 10% ReS<sub>2</sub>/ZIS and 10% ReS<sub>2</sub>/ZIS-Mix samples.

**Fig. S12.** XRD patterns of 10% ReS<sub>2</sub>/ZIS sample before and after reaction.

**Fig. S13.** (a) Re 4f, (b) In 3d, and (c) Zn 2p XPS spectra of 10% ReS<sub>2</sub>/ZIS sample before and after reaction.

**Fig. S14.** (a) Photocatalytic oxidative coupling of various benzylamine derivatives benzylamine and (b) bar chart of conversion rate for 6 h over 10% ReS<sub>2</sub>/ZIS sample.

**Fig. S15.** The cyclic voltammogram of benzylamine.

**Fig. S16.** EPR spectra of ZIS and 10%ReS<sub>2</sub>/ZIS samples in the presence of DMPO under benzylamine-acetonitrile reaction solution.

**Fig. S17.** <sup>1</sup>H NMR of intermediate products in the reaction process of photocatalytic oxidative coupling of amines.

**Fig. S18.** UV-vis absorption spectra of reaction system (benzylamine oxidation) with or without 10%ReS<sub>2</sub>/ZIS photocatalyst after adding DPD and POD.

**Table S1.** The element content of ZIS and ReS<sub>2</sub>/ZIS according to ICP result.

**Table S2.** Fitting parameters of Re 4f XPS spectra for Ar<sup>+</sup>-etched ReS<sub>2</sub>/ZIS sample before and after light illustration.

**Table S3.** The measured conductivity ( $\sigma$ ), carrier mobility ( $\mu$ ), carrier concentration (c), and I/V using electrochemical characterization.

**Table S4.** Time constant  $\tau$  of fluorescence decay curves of ZIS, 10% ReS<sub>2</sub>/ZIS-Mix and 10% ReS<sub>2</sub>/ZIS.

**Table S5.** Black experiments without catalyst nor light irradiation.

**Table S6.** Summary of photocatalysts reported for benzylamine oxidation.

### **3. Reference**

## 1. Experimental Section

### 1.1 Preparation of $\text{ZnIn}_2\text{S}_4$ (ZIS)

Typically, 136 mg of  $\text{ZnCl}_2$ , 586 mg of  $\text{InCl}_3 \cdot 4\text{H}_2\text{O}$ , and 751 mg of thioacetamide (TAA) were dissolved by sonication in 30 mL deionized water and stirred for one hour. Then the mixture was transferred into a 50 mL Teflon-lined stainless-steel autoclave and heated to 180 °C for 12 h. After nature cooling, the  $\text{ZnIn}_2\text{S}_4$  product was collected by centrifugation and subsequently washed by deionized water and ethanol for three times, and finally vacuum-dried at 60 °C.

### 1.2 Material Characterization

The crystallite property was examined using the X-ray diffraction (XRD) characterization containing a Rigaku X-ray diffractometer of Cu  $K\alpha$  radiation ( $\lambda=1.5418 \text{ \AA}$ , 50 kV, 200 mA). The scanning rate is 10 °/min from 10° to 70°. The morphology and holey property were investigated using JEOL JSM-6700F field-emission scanning electronic microscope (SEM) and JEM 2100 transmission electron microscopy (TEM) with the accelerating voltage of 10 kV and 200 kV, respectively. Hitachi UV-3900 spectrophotometer was used to analyze the UV-vis diffused reflectance spectra (DRS) of the samples, in which  $\text{BaSO}_4$  acts as blank reference. The surface areas and pore distribution were determined by  $\text{N}_2$  adsorption/desorption isotherms and Brunauer-Emmett-Teller (BET) method. The sample was heated to 150 °C maintaining 5 h in order to evacuate any moisture and solvent molecules inner the pore. The elemental analysis was carried out on an inductively coupled plasma mass spectrometry (ICP-MS, PerkinElmer, ELAN9000).

### 1.3 Photoelectrochemical measurements

The transient photocurrent responses, and electrochemical impedance spectroscopy (EIS) were investigated on a CHI760D electrochemical workstation (Shanghai Chenhua Instrument Corp., China) in a conventional three-electrode system composed of a Pt sheet counter electrode, a saturated Ag/AgCl as reference electrode and a working electrode. Firstly, the working electrode was fabricated by spin-coating ethanol suspensions onto pre-cleaned FTO glass ( $1 \times 1 \text{ cm}^2$ ) surface. Typically, 5 mg sample was dispersed evenly in 2 mL ethanol with 10  $\mu\text{L}$  Nafion solution, followed by ultrasonic treatment for 1 h to form homogeneous solution. The above solution was dipped (40  $\mu\text{L}$ ) and spin-coated ( $200 \text{ r} \cdot \text{min}^{-1}$ , 10 s) onto the pre-cleaned FTO conductive glass surface, and then dried at room temperature. The above coating process was repeated ten times. Moreover, 0.5 M  $\text{Na}_2\text{SO}_4$  aqueous solution was used as supporting electrolyte. A 300 W Xe lamp equipped with a 420 nm optical cutoff filter was used at light source.

### 1.4 Density-functional-theory (DFT) calculations

All calculations are performed with the Vienna Ab-initio Simulation Package (VASP) in the framework of density functional theory (DFT).<sup>1,2</sup> The projector augmented wave (PAW) method<sup>3,4</sup> is used to describe the electrons-ionic interactions and the generalized gradient approximation (GGA) together with the Perdew-Burke-Ernzerhof (PBE)<sup>5</sup> is employed to describe all exchange and correlation effects. Grimmes's dispersion correction D3 is used to account for the vdW interaction.<sup>6,7</sup> A cutoff energy of 400 eV is used to ensure the precision of calculations. Brillouin zone

is sampled using the Monkhorst–Pack by a  $6 \times 6 \times 1$  k-point grid for  $\text{ZnIn}_2\text{S}_4$  semiconductor and  $5 \times 5 \times 1$  k-point mesh was used for one-layer  $\text{ReS}_2$ . Gaussian smearing with a width of 50 meV was used for the occupation of electronic levels. To simulate the  $\text{ReS}_2/\text{ZnIn}_2\text{S}_4$  composites,  $\text{ReS}_2$  were put on a  $(2 \times 2)$  stoichiometric  $\text{ZnIn}_2\text{S}_4$  surface slab. Convergence criteria are set to be  $10^{-5}$  eV for energy and 0.03 eV/Å for the forces and the interaction between adjacent layers was prevented by setting up a 1.5 nm vacuum layer. To get the exact DOS results, we increased the number of k-point and use  $9 \times 9 \times 1$  k-point grid.

### 1.5 Calculation of Fermi level from UPS spectra

In the UPS spectra, it is well known that the position of vacuum level ( $E_{\text{vac}}$ ) is located 21.22 eV above the cutoff energy ( $E_{\text{cutoff}}$ ) of the spectrum. Using ZIS as example, Fig. 3a shows the  $E_{\text{cutoff}}$  of ZIS is 17.58 eV. Hence the  $E_f$  is calculated to be -3.64 eV based on the formula of  $E_{\text{cutoff}} - 21.22$  (vs. vacuum). According to the difference between vacuum energy level and NHE level, the  $E_f$  of ZIS is determined to be -0.86 V ( $-4.5 - (-3.64) = -0.86$  V) (vs. NHE).

### 1.6 Calculation formula for $k_{\text{IR}}$ and $\eta_{\text{int}}$

Based on the average lifetime of ZIS,  $\text{ReS}_2/\text{ZIS}$ , and  $\text{ReS}_2/\text{ZIS-Mix}$ , the injection rate is determined by the following formula<sup>8</sup>:

$$k_{\text{IR}} = \frac{1}{\tau_{\text{ave}}(\text{ReS}_2/\text{ZIS})} - \frac{1}{\tau_{\text{ave}}(\text{ZIS})} \quad [1]$$

$$k_{\text{IR}} = \frac{1}{\tau_{\text{ave}}(\text{ReS}_2/\text{ZCS - Mix})} - \frac{1}{\tau_{\text{ave}}(\text{ZIS})} \quad [2]$$

The efficiency of electron injection ( $\eta_{\text{int}}$ ) into  $\text{ReS}_2$ , as a more important parameter

for activity, is acquired as<sup>9</sup>:

$$\eta_{\text{inj}} = 1 - \frac{\tau_{\text{ave}}(\text{ReS}_2/\text{ZIS})}{\tau_{\text{ave}}(\text{ZIS})} \quad [3]$$

$$\eta_{\text{inj}} = 1 - \frac{\tau_{\text{ave}}(\text{ReS}_2/\text{ZCS - Mix})}{\tau_{\text{ave}}(\text{ZIS})} \quad [4]$$



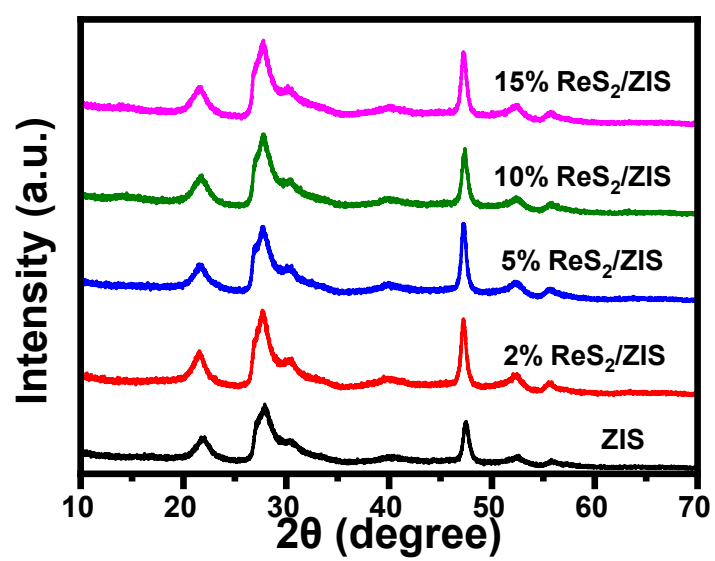

**Fig. S1.** XRD patterns of ZIS and various  $\text{ReS}_2/\text{ZIS}$  samples.

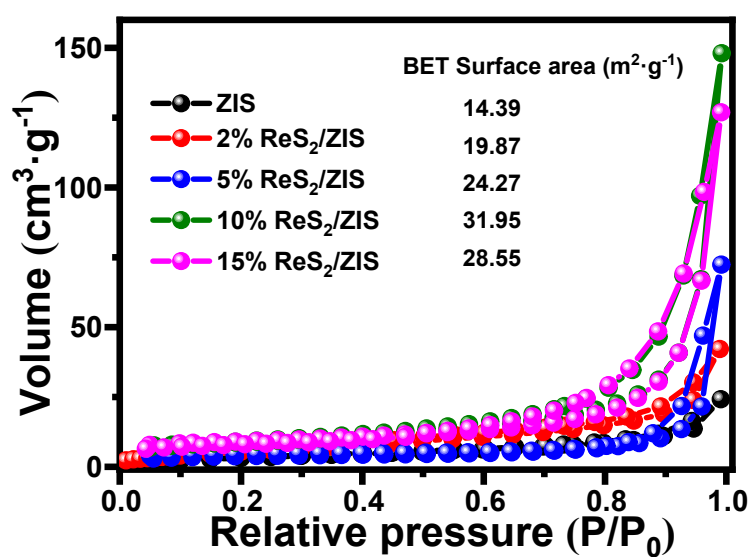

**Fig. S2.**  $\text{N}_2$  absorption-desorption isotherms of ZIS and  $\text{ReS}_2/\text{ZIS}$  samples.

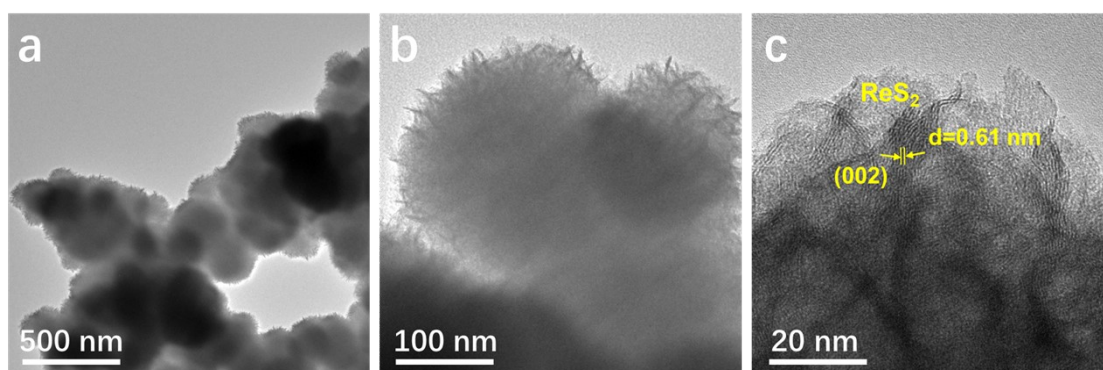

**Fig. S3.** (a and b) TEM images and (c) HRTEM image of pure  $\text{ReS}_2$ .

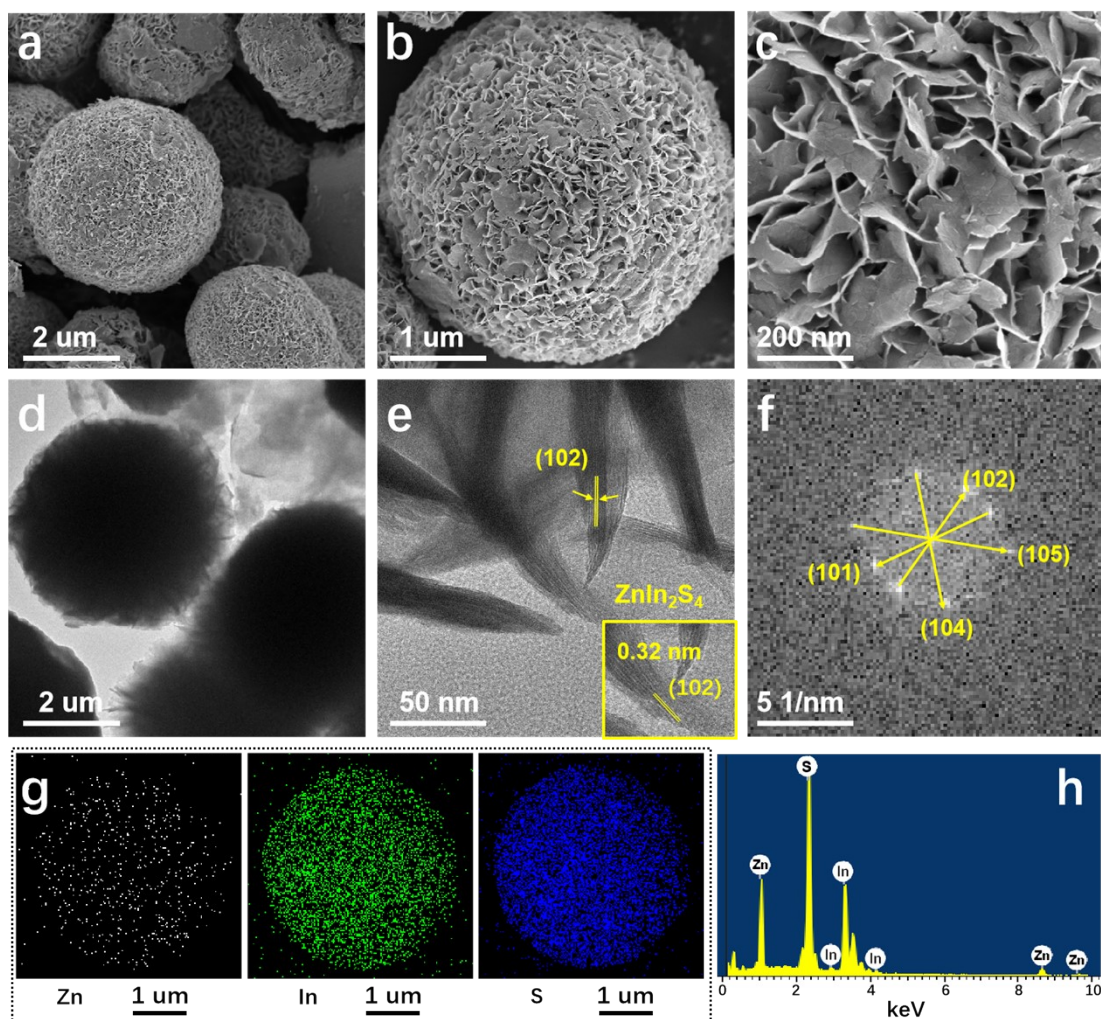

**Fig. S4.** (a-c) SEM images, (d and e) TEM images, (f) SAED image, (g) element mapping image for Zn, In, and S elements, (h) EDX image of  $\text{ZnIn}_2\text{S}_4$  sample.

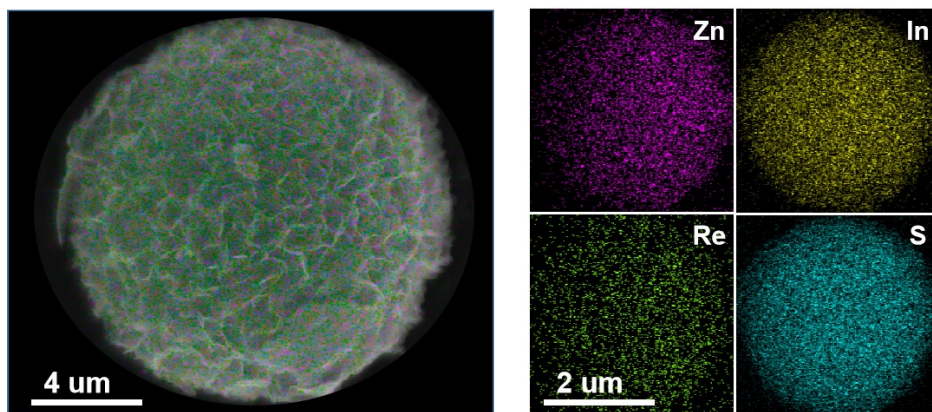

**Fig. S5.** EDX mapping images for Zn, In, Re, and S elements of 10% ReS<sub>2</sub>/ZIS sample.

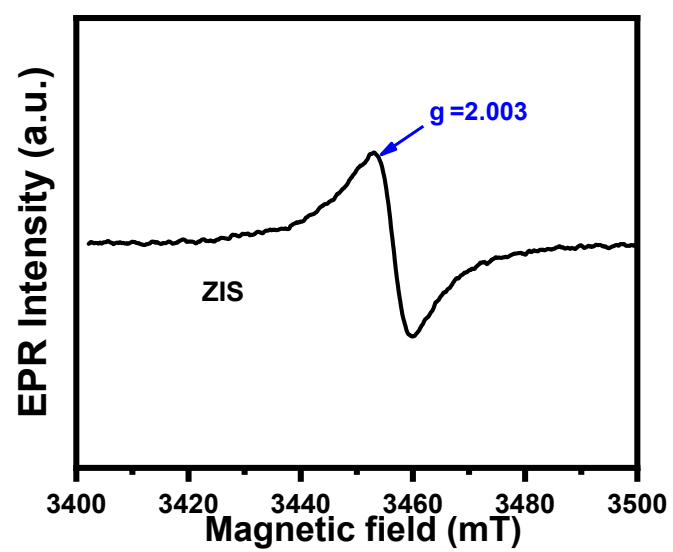

**Fig. S6.** EPR spectra of pristine ZIS.

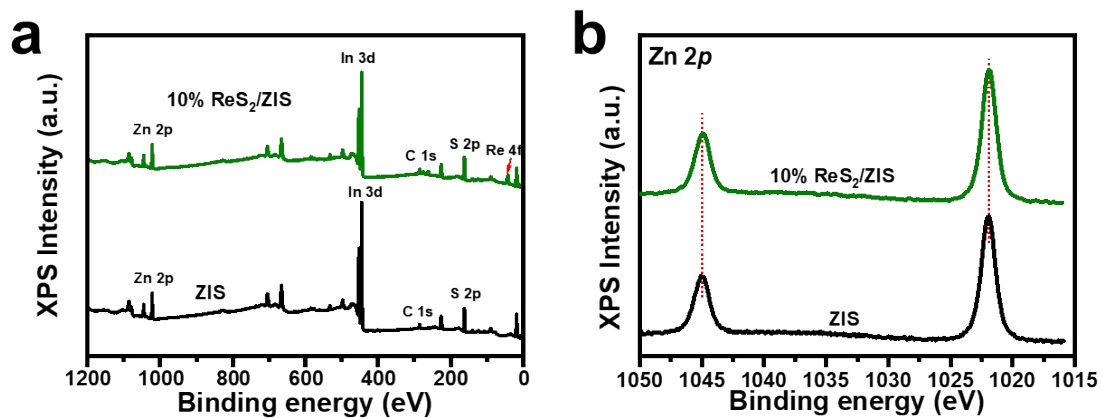

**Fig. S7.** (a) XPS survey spectra and (b) Zn 2p XPS spectra of ZIS and 10%  $\text{ReS}_2/\text{ZIS}$  samples.

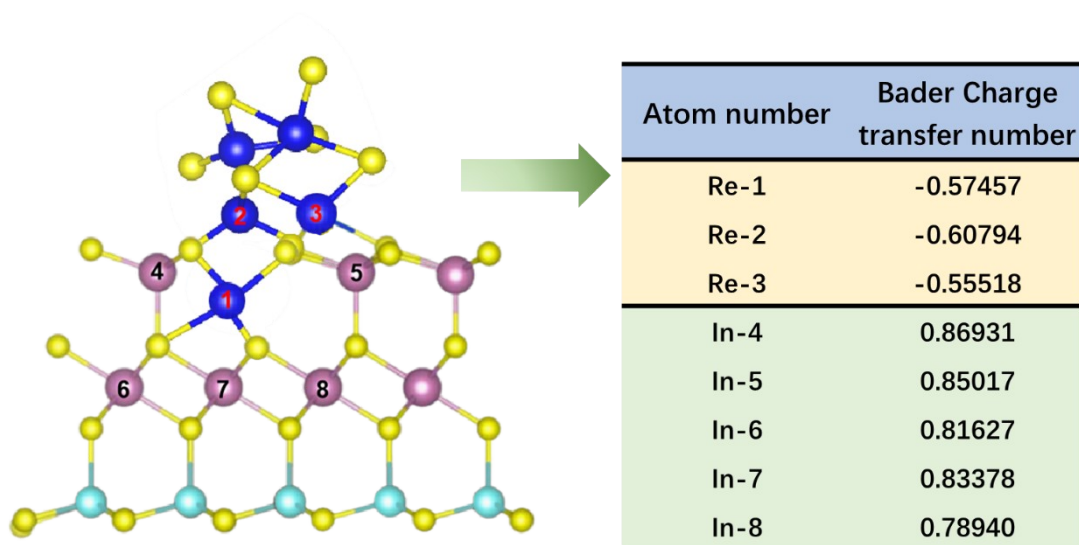

**Fig. S8.** Structural model for ReS<sub>2</sub>/ZIS and the Bader charge transfer number of neighboring atoms.



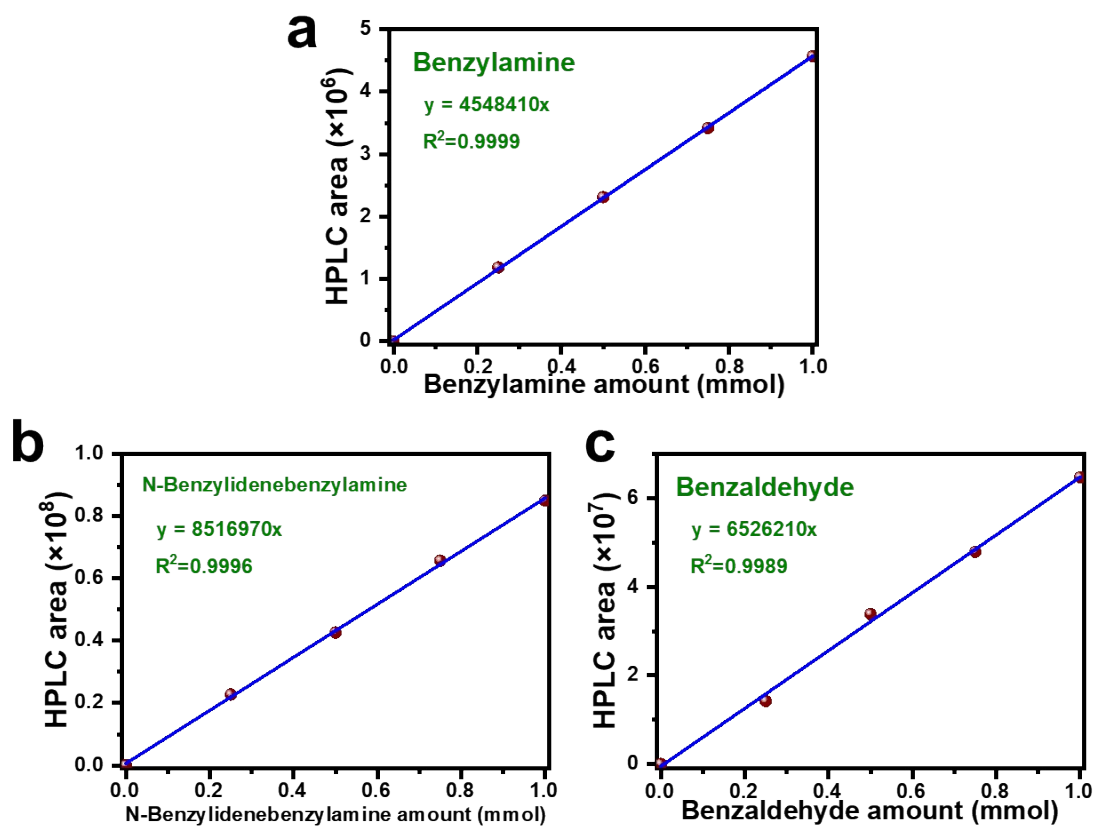

**Fig. S9.** Standard curves of (a) benzylamine, (b) N-benzylidenebenzylamine and (c) benzaldehyde by HPLC analysis.

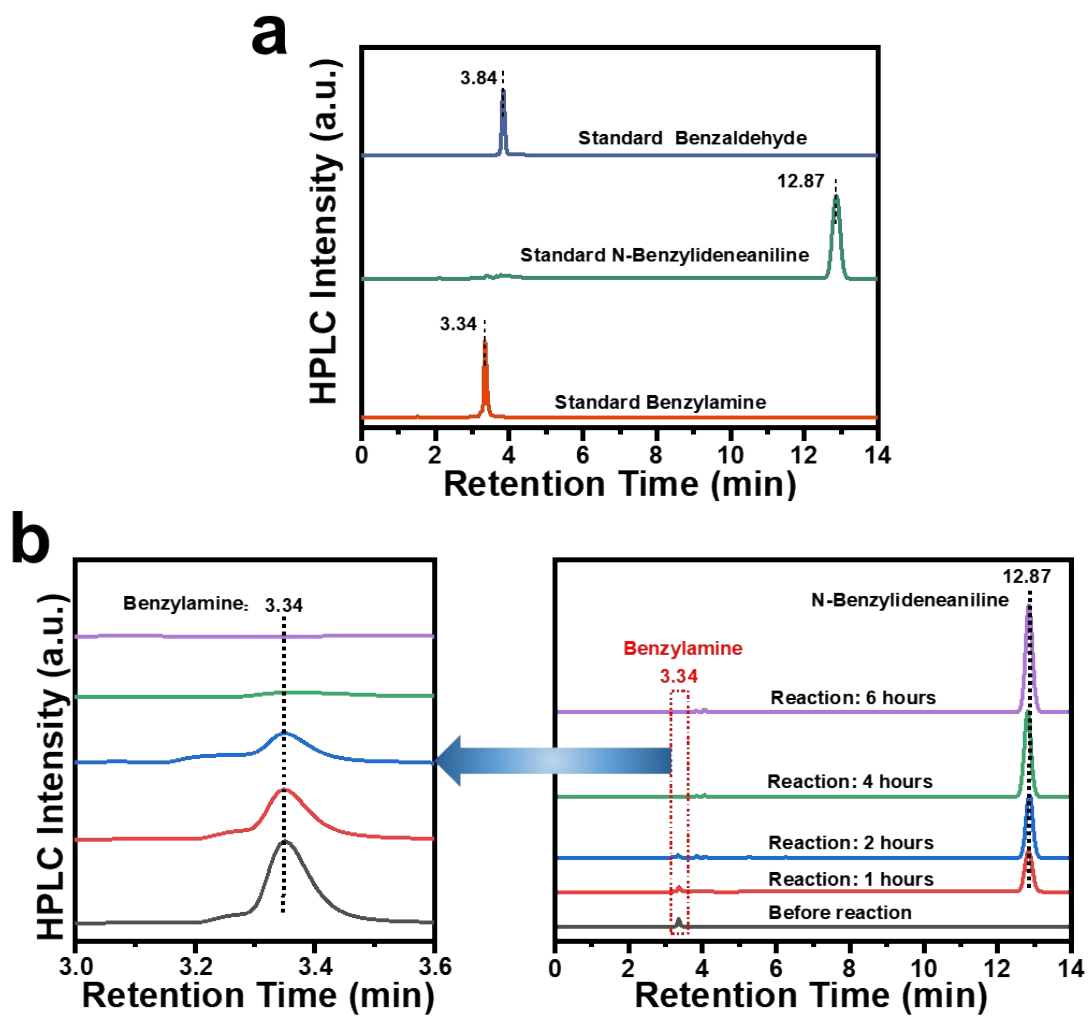

**Fig. S10.** HPLC analysis of (a) standard products and (b) intermediate products in the preliminary reduction process of oxidative coupling reaction of benzylamine.

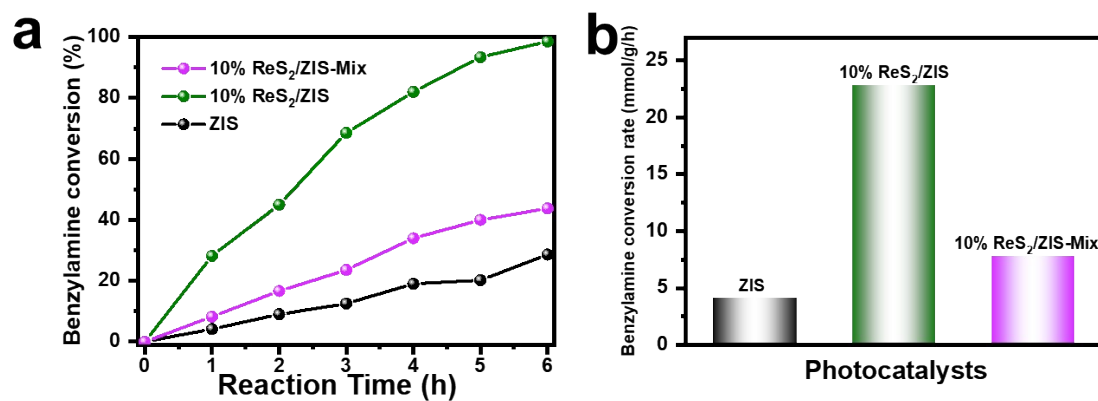

**Fig. S11.** (a) Photocatalytic oxidative coupling of benzylamine and (b) bar chart of conversion rate for 6 h over ZIS, 10% ReS<sub>2</sub>/ZIS and 10% ReS<sub>2</sub>/ZIS-Mix samples.

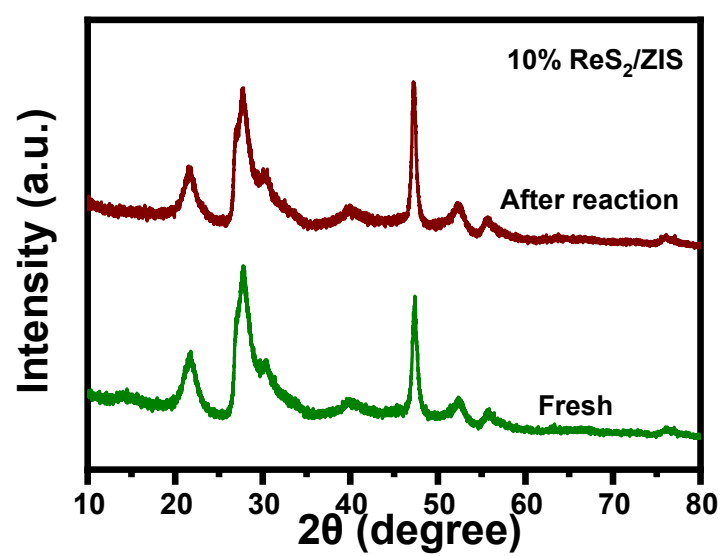

**Fig. S12.** XRD patterns of 10% ReS<sub>2</sub>/ZIS sample before and after reaction.

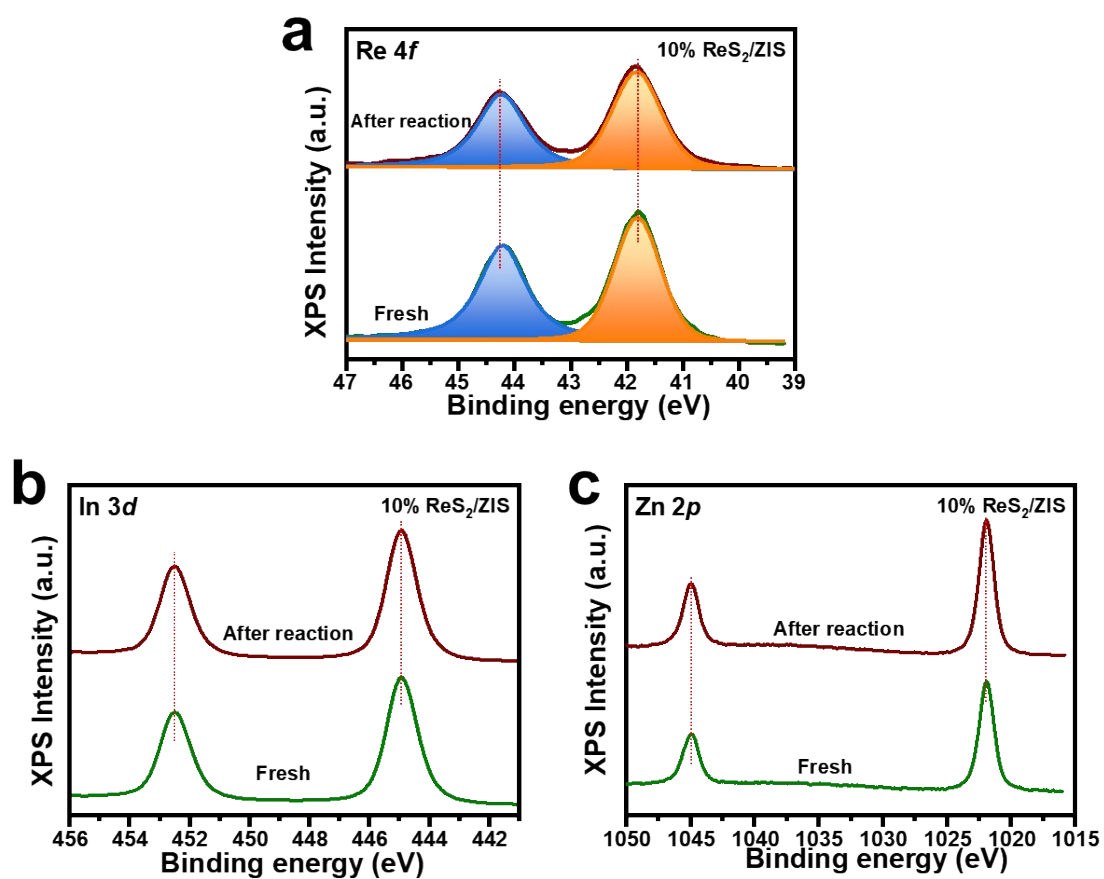

**Fig. S13.** (a) Re 4f, (b) In 3d, and (c) Zn 2p XPS spectra of 10%  $\text{ReS}_2/\text{ZIS}$  sample

before and after reaction.

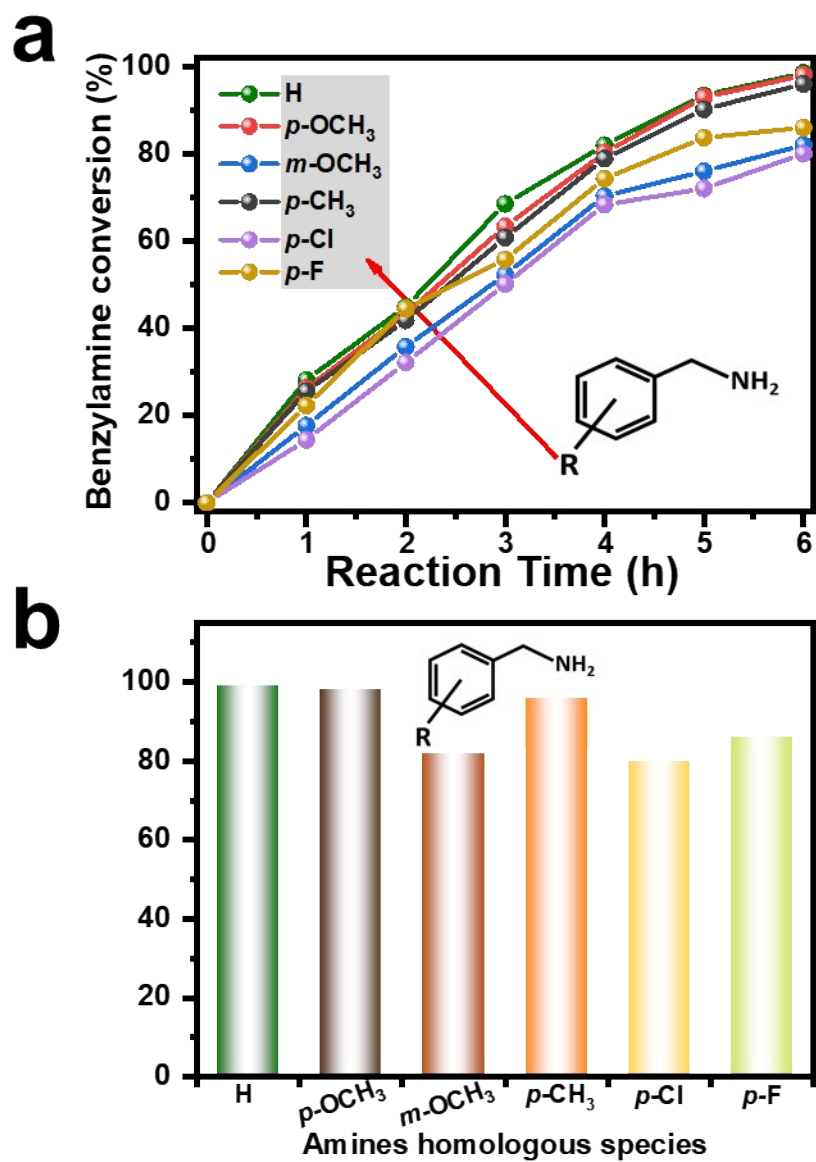

**Fig. S14.** (a) Photocatalytic oxidative coupling of various benzylamine derivatives benzylamine and (b) bar chart of conversion rate for 6 h over 10% ReS<sub>2</sub>/ZIS sample.

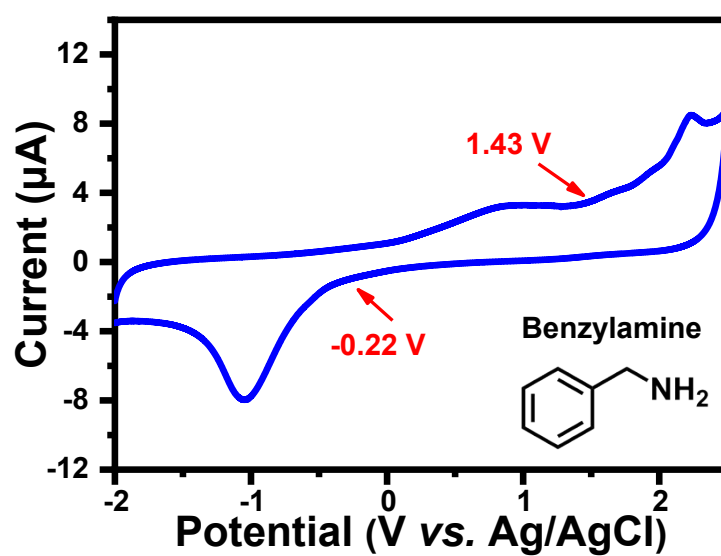

**Fig. S15.** The cyclic voltammogram of benzylamine.

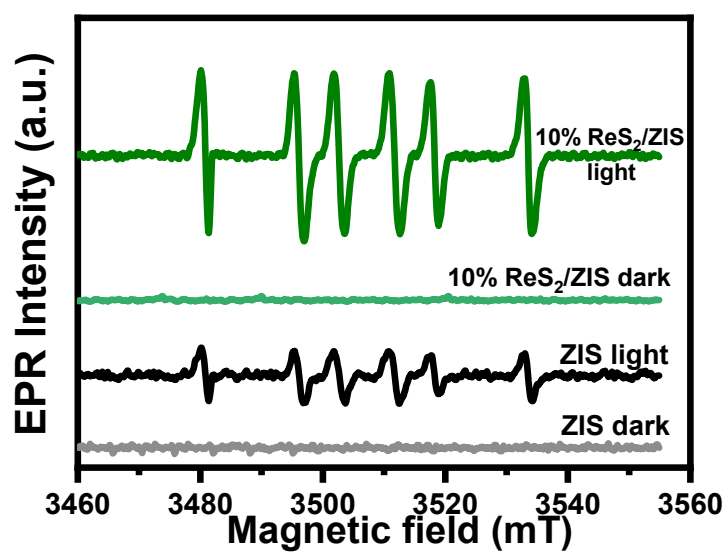

**Fig. S16.** EPR spectra of ZIS and 10%ReS<sub>2</sub>/ZIS samples in the presence of DMPO under benzylamine-acetonitrile reaction solution.



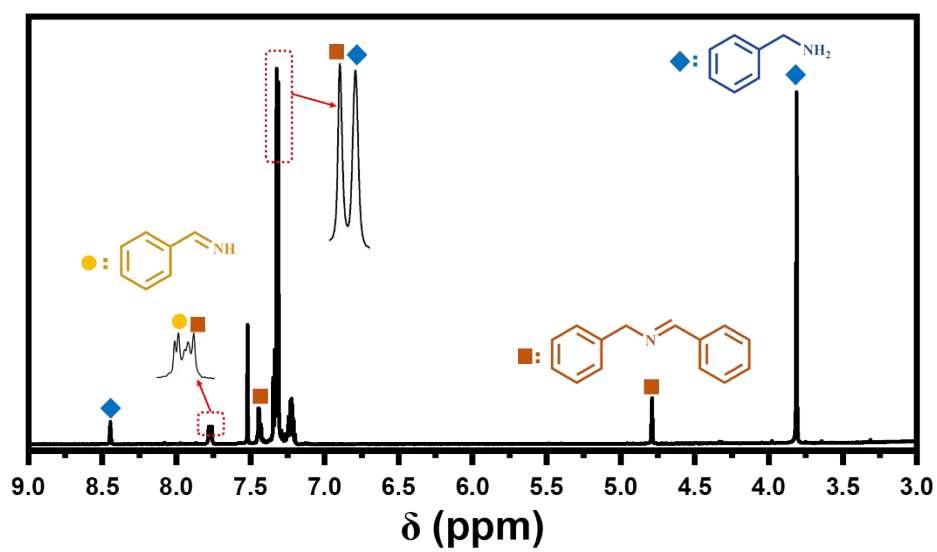

**Fig. S17.**  $^1\text{H}$  NMR of intermediate products in the reaction process of photocatalytic oxidative coupling of amines.

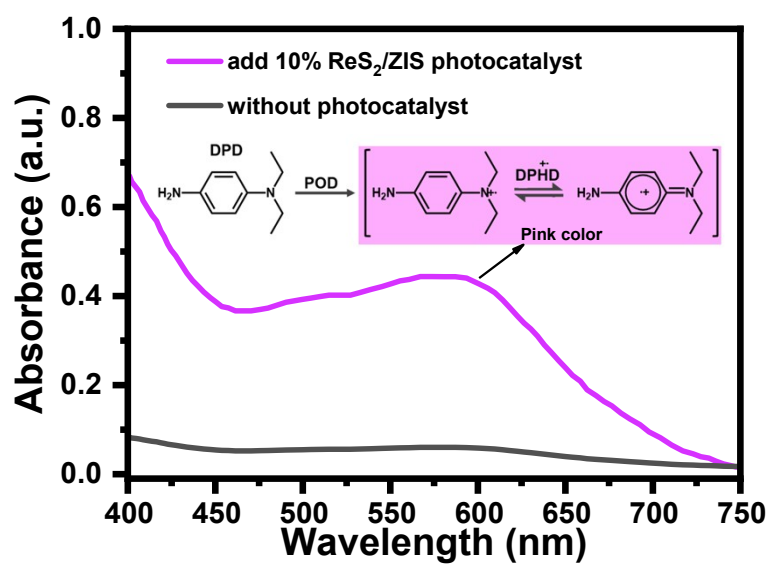

**Fig. S18.** UV-vis absorption spectra of reaction system (benzylamine oxidation) with or without 10% $\text{ReS}_2/\text{ZIS}$  photocatalyst after adding DPD and POD.

**Table S1.** The element content of ZIS and ReS<sub>2</sub>/ZIS according to ICP result.

| <b>Sample</b>                  | <b>Zn (wt%)</b> | <b>In (wt%)</b> | <b>Re (wt%)</b> |
|--------------------------------|-----------------|-----------------|-----------------|
| <b>ZIS</b>                     | 15.4619         | 53.9258         | ——              |
| <b>2% ReS<sub>2</sub>/ZIS</b>  | 15.1601         | 53.2708         | 1.4437          |
| <b>5% ReS<sub>2</sub>/ZIS</b>  | 14.7148         | 51.6637         | 3.5872          |
| <b>10% ReS<sub>2</sub>/ZIS</b> | 13.9619         | 49.0202         | 7.2112          |
| <b>15% ReS<sub>2</sub>/ZIS</b> | 13.3157         | 46.7513         | 10.3226         |

**Table S2.** Fitting parameters of Re 4f XPS spectra for Ar<sup>+</sup>-etched ReS<sub>2</sub>/ZIS sample before and after light illustration.

| Condition                                                                        | Fitting parameter  | Re <sup>4+</sup> species |         | Re <sup>(4-δ)+</sup> species |         |
|----------------------------------------------------------------------------------|--------------------|--------------------------|---------|------------------------------|---------|
|                                                                                  |                    | Peak I                   | Peak II | Peak III                     | Peak IV |
| Ar <sup>+</sup> -etched<br>ReS <sub>2</sub> /ZIS<br>before light<br>illumination | Peak position (eV) | 44.22                    | 41.61   | 43.63                        | 41.21   |
|                                                                                  | FWHM               | 1                        | 1       | 1.22                         | 0.92    |
|                                                                                  | Peak area          | 1388                     | 1505    | 1013                         | 883     |
|                                                                                  | Area percentage    | 28.98                    | 31.43   | 21.15                        | 18.44   |
|                                                                                  | (%)                | 60.41                    |         | 39.59                        |         |
| Ar <sup>+</sup> -etched<br>ReS <sub>2</sub> /ZIS<br>after light<br>illumination  | Peak position (eV) | 44.22                    | 41.61   | 43.73                        | 41.23   |
|                                                                                  | FWHM               | 1                        | 1       | 1.22                         | 0.92    |
|                                                                                  | Peak area          | 1150                     | 1441    | 1439                         | 820     |
|                                                                                  | Area percentage    | 23.71                    | 29.71   | 29.67                        | 16.91   |
|                                                                                  | (%)                | 53.42                    |         | 46.58                        |         |

**Table S3.** The measured conductivity ( $\sigma$ ), carrier mobility ( $\mu$ ), carrier concentration ( $c$ ), and I/V using electrochemical characterization.

| Sample                        | I/V ( $\mu\text{A/V}$ ) | $\sigma$ ( $\text{S}\cdot\text{m}^{-1}$ ) | $c$ ( $\text{cm}^{-3}$ ) | $\mu$ ( $\text{cm}^2\cdot\text{V}^{-1}\cdot\text{s}^{-1}$ ) <sup>1</sup> |
|-------------------------------|-------------------------|-------------------------------------------|--------------------------|--------------------------------------------------------------------------|
| ZIS                           | 0.181                   | 0.006                                     | $3.18 \times 10^{15}$    | 0.117                                                                    |
| 10% ReS <sub>2</sub> /ZIS-Mix | 0.697                   | 0.023                                     | $4.18 \times 10^{15}$    | 0.343                                                                    |
| 10% ReS <sub>2</sub> /ZIS     | 2.106                   | 0.069                                     | $5.96 \times 10^{15}$    | 0.726                                                                    |

<sup>1</sup>. The carrier mobility ( $\mu$ ) of ZIS, 10% ReS<sub>2</sub>/ZIS-Mix and 10% ReS<sub>2</sub>/ZIS samples is calculated according to the following equations:<sup>10</sup>

$$\sigma = \frac{dI}{(2n-1)LhV} \quad [5]$$

$$\sigma = cq\mu \quad [6]$$

Where  $d$  is the interelectrode spacing (75  $\mu\text{m}$ ),  $I$  is the current,  $n$  is the number of electrode digits (the interdigitated array electrode in our measurement is composed of  $n = 10$  pairs of ITO electrode digits deposited onto a glass substrate),  $L$  is the overlapping length of the electrodes (6000  $\mu\text{m}$ ),  $h$  is the film thickness (20 nm),  $c$  is the charge carrier concentration, and  $q$  stands for elementary charge ( $1.6 \times 10^{-19}$  C).

**Table S4.** Time constant  $\tau$  of fluorescence decay curves of ZIS, 10% ReS<sub>2</sub>/ZIS-Mix and 10% ReS<sub>2</sub>/ZIS.

| Samples                       | $\tau_1$ (ns) | A <sub>1</sub> % | $\tau_2$ (ns) | A <sub>2</sub> % | $\tau_3$ (ns) | A <sub>3</sub> % | $\tau_{ave}$ (ns) |
|-------------------------------|---------------|------------------|---------------|------------------|---------------|------------------|-------------------|
| ZIS                           | 0.8312        | 18.11            | 4.5452        | 45.83            | 40.0107       | 36.06            | 35.2227           |
| 10% ReS <sub>2</sub> /ZIS-Mix | 0.7927        | 36.95            | 3.8388        | 38.51            | 38.9262       | 24.54            | 33.3591           |
| 10% ReS <sub>2</sub> /ZIS     | 0.7576        | 51.52            | 2.8399        | 32.67            | 29.8186       | 15.81            | 23.7889           |

**Table S5.** Black experiments without catalyst nor light irradiation.<sup>a</sup>

| Entry | Photocatalyst             | Irradiation<br>condition | Benzylamine<br>conversion (%) | Imine yield<br>(%) |
|-------|---------------------------|--------------------------|-------------------------------|--------------------|
| 1     | 10% ReS <sub>2</sub> /ZIS | /                        | /                             | /                  |
| 2     | /                         | ≥420 nm                  | /                             | /                  |

<sup>a</sup> Reaction conditions: photocatalyst (10 mg), substrate (1 mmol), solvent 10 mL acetonitrile, room temperature, Xenon lamp ( $\lambda \geq 420$  nm).

**Table S6.** Summary of photocatalysts reported for benzylamine oxidation.

| Catalyst                                                  | Benzylamine amount<br>(mmol) | Reaction time (h) | Solvent                       | TOF <sup>a</sup> | Reference                                           |
|-----------------------------------------------------------|------------------------------|-------------------|-------------------------------|------------------|-----------------------------------------------------|
| 1%Pt/TiO <sub>2</sub> -500 (50 mg)                        | 1.074                        | 12                | H <sub>2</sub> O+acetonitrile | 0.974            | Catal. Sci. Technol., 2019, 9, 5803                 |
| Polyhedral SrTiO <sub>3</sub> (4 mg)                      | 0.4                          | 16                | acetonitrile                  | 6.25             | J. Mater. Chem. A, 2023, 11, 22198                  |
| COF-Sr2Fe1 (5 mg)                                         | 1.5                          | 1.5               | acetonitrile                  | 19.4             | J. Colloid Interface Sci. 2024, 655, 611            |
| 4-NA-Cu <sub>2</sub> O (3 mg)                             | 1                            | 18                | acetonitrile                  | 18.2             | ACS Catal. 2023, 13, 1474.                          |
| Titanium-Porphyrinic<br>Aerogels (5 mg)                   | 1                            | 10                | acetonitrile                  | 20.00            | Angew. Chem. Int. Ed., 2020, 59, 21591              |
| Bi <sub>24</sub> O <sub>31</sub> Br <sub>10</sub> (20 mg) | 0.2                          | 12                | H <sub>2</sub> O              | 0.82             | ChemSusChem, 2020, 13, 116                          |
| GICN (10 mg)                                              | 0.2                          | 8                 | acetonitrile                  | 2.33             | Appl. Catal. B: Environ, 2020, 278, 119342          |
| g-C <sub>3</sub> N <sub>4</sub> /BiOBr (100 mg)           | 0.125                        | 4                 | acetonitrile                  | 0.29             | Chem. Eng. J., 2020, 394, 124934                    |
| Conjugated polyimide (50 mg)                              | 0.1                          | 6                 | acetonitrile                  | 0.30             | Appl. Catal. B: Environ, 2020, 272, 118964          |
| CdS@C <sub>3</sub> N <sub>4</sub> (5 mg)                  | 0.3                          | 4                 | acetonitrile                  | 12.55            | Appl. Catal. B: Environ, 2018, 236, 176             |
| 20% PDI/mpgCN (8 mg)                                      | 1                            | 6                 | acetonitrile                  | 20.63            | Appl. Catal. B: Environ, <b>2021</b> , 298, 120534. |
| <b>10% ReS<sub>2</sub>/ZIS (10 mg)</b>                    | <b>1</b>                     | <b>6</b>          | <b>acetonitrile</b>           | <b>22.84</b>     | <b>This work</b>                                    |

<sup>a</sup> TOF: mmol of amine converted per gram of photocatalyst per hour.



## References

1. G. Kresse, *J. Non-Cryst. Solids*, 1995, **192-193**, 222-229.
2. G. Kresse and J. Furthmuller, *Phys. Rev. B Condens. Matter.*, 1996, **54**, 11169-11186.
3. P. E. Blochl, *Phys. Rev. B Condens. Matter.*, 1994, **50**, 17953-17979.
4. G. Kresse and D. Joubert, *Phys. Rev. B*, 1999, **59**, 1758-1775.
5. J. P. Perdew, K. Burke and M. Ernzerhof, *Phys. Rev. Lett.*, 1996, **77**, 3865-3868.
6. S. Grimme, S. Ehrlich and L. Goerigk, *J. Comput. Chem.*, 2011, **32**, 1456-1465.
7. S. Grimme, J. Antony, S. Ehrlich and H. Krieg, *J. Chem. Phys.*, 2010, **132**, 154104.
8. M. Abdellah, K. Židek, K. Zheng, P. Chábera, M.E. Messing and T. Pullerits, *J. Phys. Chem. Lett.*, 2013, **4**, 1760-1765.
9. X. Shi, M. Fujitsuka, S. Kim and T. Majima, *Small*, 2018, **14**, e1703277.
10. G. Yu, K. Gong, C. Xing, L. Hu, H. Huang, L. Gao, D. Wang and X. Li, *Chem. Eng. J.*, 2023, **461**, 142140.
